# Supplementary material for: Does fructose have a protective role on migraine?—experimental evidence in a rat model of metabolic syndrome under omega-3 supplementation
Source: PubMed Central journal article supplement — Ann Transl Med. 2022 Apr;10(8):435. doi: 10.21037/atm-21-5699 (PMC9096372; doi:10.21037/atm-21-5699), 2022-04
Supplement: atm-10-08-435-coif.pdf [file atm-10-08-435-coif.pdf]

## ICMJE DISCLOSURE FORM

Date: December 21<sup>th</sup>, 2021

Your Name: Isadora Randon Barbosa

Manuscript Title: Does fructose have a protective role on migraine? Experimental evidence in a rat model of metabolic syndrome under omega-3 supplementation

Manuscript number (if known): ATM-21-5699-CL

In the interest of transparency, we ask you to disclose all relationships/activities/interests listed below that are related to the content of your manuscript. "Related" means any relation with for-profit or not-for-profit third parties whose interests may be affected by the content of the manuscript. Disclosure represents a commitment to transparency and does not necessarily indicate a bias. If you are in doubt about whether to list a relationship/activity/interest, it is preferable that you do so.

The following questions apply to the author's relationships/activities/interests as they relate to the current manuscript only.

The author's relationships/activities/interests should be defined broadly. For example, if your manuscript pertains to the epidemiology of hypertension, you should declare all relationships with manufacturers of antihypertensive medication, even if that medication is not mentioned in the manuscript.

In item #1 below, report all support for the work reported in this manuscript without time limit. For all other items, the time frame for disclosure is the past 36 months.

|                                                           |                                                                                                                                                                                | Name all entities with whom you have this relationship or indicate none (add rows as needed)                                                                                                                                                                                                                                                               | Specifications/Comments (e.g., if payments were made to you or to your institution)                                                                                                        |
|-----------------------------------------------------------|--------------------------------------------------------------------------------------------------------------------------------------------------------------------------------|------------------------------------------------------------------------------------------------------------------------------------------------------------------------------------------------------------------------------------------------------------------------------------------------------------------------------------------------------------|--------------------------------------------------------------------------------------------------------------------------------------------------------------------------------------------|
| <b>Time frame: Since the initial planning of the work</b> |                                                                                                                                                                                |                                                                                                                                                                                                                                                                                                                                                            |                                                                                                                                                                                            |
| 1                                                         | All support for the present manuscript (e.g., funding, provision of study materials, medical writing, article processing charges, etc.)<br><b>No time limit for this item.</b> | Coordenação de Aperfeiçoamento de Nível Superior (CAPES; Financial Code 001), Conselho Nacional de Desenvolvimento Científico e Tecnológico (CNPQ) and Fundação de Amparo à Pesquisa do Estado do Rio Grande do Sul (FAPERGS). M.M.C. is a researcher career awardee of the Conselho Nacional de Desenvolvimento Científico e Tecnológico (304042/2018-8). |                                                                                                                                                                                            |
| <b>Time frame: past 36 months</b>                         |                                                                                                                                                                                |                                                                                                                                                                                                                                                                                                                                                            |                                                                                                                                                                                            |
| 2                                                         | Grants or contracts from any entity (if not indicated in item #1 above).                                                                                                       | <input type="checkbox"/> <input checked="" type="checkbox"/> None                                                                                                                                                                                                                                                                                          | The authors did not receive any grants or contracts from any entity, except as indicated in item #1.                                                                                       |
| 3                                                         | Royalties or licenses                                                                                                                                                          | <input type="checkbox"/> <input checked="" type="checkbox"/> None                                                                                                                                                                                                                                                                                          | The authors did not receive any royalties or licenses from any entity, except as indicated in item #1.                                                                                     |
| 4                                                         | Consulting fees                                                                                                                                                                | <input checked="" type="checkbox"/> None                                                                                                                                                                                                                                                                                                                   | The authors did not receive any consulting fees from any entity, except as indicated in item #1.                                                                                           |
| 5                                                         | Payment or honoraria for lectures, presentations, speakers bureaus, manuscript writing or                                                                                      | <input type="checkbox"/> <input checked="" type="checkbox"/> None                                                                                                                                                                                                                                                                                          | The authors did not receive payment or honoraria for lectures, presentations, speakers' bureaus, manuscript writing or educational events from any entity, except as indicated in item #1. |

|    |                                                                                                   |                                          |                                                                                                                           |
|----|---------------------------------------------------------------------------------------------------|------------------------------------------|---------------------------------------------------------------------------------------------------------------------------|
|    | educational events                                                                                |                                          |                                                                                                                           |
| 6  | Payment for expert testimony                                                                      | <input checked="" type="checkbox"/> None | The authors did not receive payment for expert testimony from any entity, except as indicated in item #1.                 |
| 7  | Support for attending meetings and/or travel                                                      | <input checked="" type="checkbox"/> None | The authors did not receive support for attending meetings and/or travel from any entity, except as indicated in item #1. |
| 8  | Patents planned, issued or pending                                                                | <input checked="" type="checkbox"/> None | The authors do not have any patents planned, issued or pending related to the manuscript.                                 |
| 9  | Participation on a Data Safety Monitoring Board or Advisory Board                                 | <input checked="" type="checkbox"/> None | The authors declare no participation on data safety monitoring board or advisory board.                                   |
| 10 | Leadership or fiduciary role in other board, society, committee or advocacy group, paid or unpaid | <input checked="" type="checkbox"/> None | The authors do not play any role in leadership or fiduciary, society, committee or advocacy group, paid or unpaid.        |
| 11 | Stock or stock options                                                                            | <input checked="" type="checkbox"/> None | The authors declare no stock or stock options related to the manuscript.                                                  |
| 12 | Receipt of equipment, materials, drugs, medical writing, gifts or other services                  | <input checked="" type="checkbox"/> None | The authors declare no received equipment, materials, drugs, medical writing, gifts or other services.                    |
| 13 | Other financial or non-financial interests                                                        | <input checked="" type="checkbox"/> None | We declare no financial interests.                                                                                        |

**Please summarize the above conflict of interest in the following box:**

This work was supported by grants from the Coordenação de Aperfeiçoamento de Nível Superior (CAPES; Financial Code 001), Conselho Nacional de Desenvolvimento Científico e Tecnológico (CNPQ) and Fundação de Amparo à Pesquisa do Estado do Rio Grande do Sul (FAPERGS). M.M.C. is a researcher career awardee of the Conselho Nacional de Desenvolvimento Científico e Tecnológico (304042/2018-8).

**Please place an "X" next to the following statement to indicate your agreement:**

**X I certify that I have answered every question and have not altered the wording of any of the questions on this form.**

## ICMJE DISCLOSURE FORM

Date: December 21<sup>th</sup>, 2021

Your Name: Gabriela da Cunha

Manuscript Title: Does fructose have a protective role on migraine? Experimental evidence in a rat model of metabolic syndrome under omega-3 supplementation

Manuscript number (if known): ATM-21-5699-CL

In the interest of transparency, we ask you to disclose all relationships/activities/interests listed below that are related to the content of your manuscript. "Related" means any relation with for-profit or not-for-profit third parties whose interests may be affected by the content of the manuscript. Disclosure represents a commitment to transparency and does not necessarily indicate a bias. If you are in doubt about whether to list a relationship/activity/interest, it is preferable that you do so.

The following questions apply to the author's relationships/activities/interests as they relate to the **current manuscript only**.

The author's relationships/activities/interests should be **defined broadly**. For example, if your manuscript pertains to the epidemiology of hypertension, you should declare all relationships with manufacturers of antihypertensive medication, even if that medication is not mentioned in the manuscript.

In item #1 below, report all support for the work reported in this manuscript without time limit. For all other items, the time frame for disclosure is the past 36 months.

|                                                           |                                                                                                                                                                                | Name all entities with whom you have this relationship or indicate none (add rows as needed)                                                                                                                                                                                                                                                               | Specifications/Comments (e.g., if payments were made to you or to your institution)                                                                                                        |
|-----------------------------------------------------------|--------------------------------------------------------------------------------------------------------------------------------------------------------------------------------|------------------------------------------------------------------------------------------------------------------------------------------------------------------------------------------------------------------------------------------------------------------------------------------------------------------------------------------------------------|--------------------------------------------------------------------------------------------------------------------------------------------------------------------------------------------|
| <b>Time frame: Since the initial planning of the work</b> |                                                                                                                                                                                |                                                                                                                                                                                                                                                                                                                                                            |                                                                                                                                                                                            |
| 1                                                         | All support for the present manuscript (e.g., funding, provision of study materials, medical writing, article processing charges, etc.)<br><b>No time limit for this item.</b> | Coordenação de Aperfeiçoamento de Nível Superior (CAPES; Financial Code 001), Conselho Nacional de Desenvolvimento Científico e Tecnológico (CNPQ) and Fundação de Amparo à Pesquisa do Estado do Rio Grande do Sul (FAPERGS). M.M.C. is a researcher career awardee of the Conselho Nacional de Desenvolvimento Científico e Tecnológico (304042/2018-8). |                                                                                                                                                                                            |
| <b>Time frame: past 36 months</b>                         |                                                                                                                                                                                |                                                                                                                                                                                                                                                                                                                                                            |                                                                                                                                                                                            |
| 2                                                         | Grants or contracts from any entity (if not indicated in item #1 above).                                                                                                       | <input type="checkbox"/> X <input type="checkbox"/> None                                                                                                                                                                                                                                                                                                   | The authors did not receive any grants or contracts from any entity, except as indicated in item #1.                                                                                       |
| 3                                                         | Royalties or licenses                                                                                                                                                          | <input type="checkbox"/> X <input type="checkbox"/> None                                                                                                                                                                                                                                                                                                   | The authors did not receive any royalties or licenses from any entity, except as indicated in item #1.                                                                                     |
| 4                                                         | Consulting fees                                                                                                                                                                | X None                                                                                                                                                                                                                                                                                                                                                     | The authors did not receive any consulting fees from any entity, except as indicated in item #1.                                                                                           |
| 5                                                         | Payment or honoraria for lectures, presentations, speakers bureaus, manuscript writing or                                                                                      | <input type="checkbox"/> X <input type="checkbox"/> None                                                                                                                                                                                                                                                                                                   | The authors did not receive payment or honoraria for lectures, presentations, speakers' bureaus, manuscript writing or educational events from any entity, except as indicated in item #1. |

|    |                                                                                                   |                                          |                                                                                                                           |
|----|---------------------------------------------------------------------------------------------------|------------------------------------------|---------------------------------------------------------------------------------------------------------------------------|
|    | educational events                                                                                |                                          |                                                                                                                           |
| 6  | Payment for expert testimony                                                                      | <input checked="" type="checkbox"/> None | The authors did not receive payment for expert testimony from any entity, except as indicated in item #1.                 |
| 7  | Support for attending meetings and/or travel                                                      | <input checked="" type="checkbox"/> None | The authors did not receive support for attending meetings and/or travel from any entity, except as indicated in item #1. |
| 8  | Patents planned, issued or pending                                                                | <input checked="" type="checkbox"/> None | The authors do not have any patents planned, issued or pending related to the manuscript.                                 |
| 9  | Participation on a Data Safety Monitoring Board or Advisory Board                                 | <input checked="" type="checkbox"/> None | The authors declare no participation on data safety monitoring board or advisory board.                                   |
| 10 | Leadership or fiduciary role in other board, society, committee or advocacy group, paid or unpaid | <input checked="" type="checkbox"/> None | The authors do not play any role in leadership or fiduciary, society, committee or advocacy group, paid or unpaid.        |
| 11 | Stock or stock options                                                                            | <input checked="" type="checkbox"/> None | The authors declare no stock or stock options related to the manuscript.                                                  |
| 12 | Receipt of equipment, materials, drugs, medical writing, gifts or other services                  | <input checked="" type="checkbox"/> None | The authors declare no received equipment, materials, drugs, medical writing, gifts or other services.                    |
| 13 | Other financial or non-financial interests                                                        | <input checked="" type="checkbox"/> None | We declare no financial interests.                                                                                        |

**Please summarize the above conflict of interest in the following box:**

This work was supported by grants from the Coordenação de Aperfeiçoamento de Nível Superior (CAPES; Financial Code 001), Conselho Nacional de Desenvolvimento Científico e Tecnológico (CNPQ) and Fundação de Amparo à Pesquisa do Estado do Rio Grande do Sul (FAPERGS). M.M.C. is a researcher career awardee of the Conselho Nacional de Desenvolvimento Científico e Tecnológico (304042/2018-8).

**Please place an "X" next to the following statement to indicate your agreement:**

**X I certify that I have answered every question and have not altered the wording of any of the questions on this form.**

## ICMJE DISCLOSURE FORM

Date: December 21<sup>th</sup>, 2021

Your Name: Rodrigo Braccini Madeira da Silva

Manuscript Title: Does fructose have a protective role on migraine? Experimental evidence in a rat model of metabolic syndrome under omega-3 supplementation

Manuscript number (if known): ATM-21-5699-CL

In the interest of transparency, we ask you to disclose all relationships/activities/interests listed below that are related to the content of your manuscript. "Related" means any relation with for-profit or not-for-profit third parties whose interests may be affected by the content of the manuscript. Disclosure represents a commitment to transparency and does not necessarily indicate a bias. If you are in doubt about whether to list a relationship/activity/interest, it is preferable that you do so.

The following questions apply to the author's relationships/activities/interests as they relate to the **current manuscript only**.

The author's relationships/activities/interests should be **defined broadly**. For example, if your manuscript pertains to the epidemiology of hypertension, you should declare all relationships with manufacturers of antihypertensive medication, even if that medication is not mentioned in the manuscript.

In item #1 below, report all support for the work reported in this manuscript without time limit. For all other items, the time frame for disclosure is the past 36 months.

|                                                           |                                                                                                                                                                                | Name all entities with whom you have this relationship or indicate none (add rows as needed)                                                                                                                                                                                                                                                               | Specifications/Comments (e.g., if payments were made to you or to your institution)                                                                                                        |
|-----------------------------------------------------------|--------------------------------------------------------------------------------------------------------------------------------------------------------------------------------|------------------------------------------------------------------------------------------------------------------------------------------------------------------------------------------------------------------------------------------------------------------------------------------------------------------------------------------------------------|--------------------------------------------------------------------------------------------------------------------------------------------------------------------------------------------|
| <b>Time frame: Since the initial planning of the work</b> |                                                                                                                                                                                |                                                                                                                                                                                                                                                                                                                                                            |                                                                                                                                                                                            |
| 1                                                         | All support for the present manuscript (e.g., funding, provision of study materials, medical writing, article processing charges, etc.)<br><b>No time limit for this item.</b> | Coordenação de Aperfeiçoamento de Nível Superior (CAPES; Financial Code 001), Conselho Nacional de Desenvolvimento Científico e Tecnológico (CNPQ) and Fundação de Amparo à Pesquisa do Estado do Rio Grande do Sul (FAPERGS). M.M.C. is a researcher career awardee of the Conselho Nacional de Desenvolvimento Científico e Tecnológico (304042/2018-8). |                                                                                                                                                                                            |
| <b>Time frame: past 36 months</b>                         |                                                                                                                                                                                |                                                                                                                                                                                                                                                                                                                                                            |                                                                                                                                                                                            |
| 2                                                         | Grants or contracts from any entity (if not indicated in item #1 above).                                                                                                       | <input type="checkbox"/> X <input type="checkbox"/> None                                                                                                                                                                                                                                                                                                   | The authors did not receive any grants or contracts from any entity, except as indicated in item #1.                                                                                       |
| 3                                                         | Royalties or licenses                                                                                                                                                          | <input type="checkbox"/> X <input type="checkbox"/> None                                                                                                                                                                                                                                                                                                   | The authors did not receive any royalties or licenses from any entity, except as indicated in item #1.                                                                                     |
| 4                                                         | Consulting fees                                                                                                                                                                | X None                                                                                                                                                                                                                                                                                                                                                     | The authors did not receive any consulting fees from any entity, except as indicated in item #1.                                                                                           |
| 5                                                         | Payment or honoraria for lectures, presentations, speakers bureaus, manuscript writing or                                                                                      | <input type="checkbox"/> X <input type="checkbox"/> None                                                                                                                                                                                                                                                                                                   | The authors did not receive payment or honoraria for lectures, presentations, speakers' bureaus, manuscript writing or educational events from any entity, except as indicated in item #1. |

|    |                                                                                                   |                                                                     |                                                                                                                           |
|----|---------------------------------------------------------------------------------------------------|---------------------------------------------------------------------|---------------------------------------------------------------------------------------------------------------------------|
|    | educational events                                                                                |                                                                     |                                                                                                                           |
| 6  | Payment for expert testimony                                                                      | <input checked="" type="checkbox"/> X <input type="checkbox"/> None | The authors did not receive payment for expert testimony from any entity, except as indicated in item #1.                 |
| 7  | Support for attending meetings and/or travel                                                      | <input checked="" type="checkbox"/> X <input type="checkbox"/> None | The authors did not receive support for attending meetings and/or travel from any entity, except as indicated in item #1. |
| 8  | Patents planned, issued or pending                                                                | <input checked="" type="checkbox"/> X <input type="checkbox"/> None | The authors do not have any patents planned, issued or pending related to the manuscript.                                 |
| 9  | Participation on a Data Safety Monitoring Board or Advisory Board                                 | <input checked="" type="checkbox"/> X <input type="checkbox"/> None | The authors declare no participation on data safety monitoring board or advisory board.                                   |
| 10 | Leadership or fiduciary role in other board, society, committee or advocacy group, paid or unpaid | <input checked="" type="checkbox"/> X <input type="checkbox"/> None | The authors do not play any role in leadership or fiduciary, society, committee or advocacy group, paid or unpaid.        |
| 11 | Stock or stock options                                                                            | <input checked="" type="checkbox"/> X <input type="checkbox"/> None | The authors declare no stock or stock options related to the manuscript.                                                  |
| 12 | Receipt of equipment, materials, drugs, medical writing, gifts or other services                  | <input checked="" type="checkbox"/> X <input type="checkbox"/> None | The authors declare no received equipment, materials, drugs, medical writing, gifts or other services.                    |
| 13 | Other financial or non-financial interests                                                        | <input checked="" type="checkbox"/> X <input type="checkbox"/> None | We declare no financial interests.                                                                                        |

**Please summarize the above conflict of interest in the following box:**

This work was supported by grants from the Coordenação de Aperfeiçoamento de Nível Superior (CAPES; Financial Code 001), Conselho Nacional de Desenvolvimento Científico e Tecnológico (CNPQ) and Fundação de Amparo à Pesquisa do Estado do Rio Grande do Sul (FAPERGS). M.M.C. is a researcher career awardee of the Conselho Nacional de Desenvolvimento Científico e Tecnológico (304042/2018-8).

**Please place an “X” next to the following statement to indicate your agreement:**

**X I certify that I have answered every question and have not altered the wording of any of the questions on this form.**

## ICMJE DISCLOSURE FORM

Date: December 21<sup>th</sup>, 2021

Your Name: Raquel Dal Sasso Freitas

Manuscript Title: Does fructose have a protective role on migraine? Experimental evidence in a rat model of metabolic syndrome under omega-3 supplementation

Manuscript number (if known): ATM-21-5699-CL

In the interest of transparency, we ask you to disclose all relationships/activities/interests listed below that are related to the content of your manuscript. "Related" means any relation with for-profit or not-for-profit third parties whose interests may be affected by the content of the manuscript. Disclosure represents a commitment to transparency and does not necessarily indicate a bias. If you are in doubt about whether to list a relationship/activity/interest, it is preferable that you do so.

The following questions apply to the author's relationships/activities/interests as they relate to the **current manuscript only**.

The author's relationships/activities/interests should be **defined broadly**. For example, if your manuscript pertains to the epidemiology of hypertension, you should declare all relationships with manufacturers of antihypertensive medication, even if that medication is not mentioned in the manuscript.

In item #1 below, report all support for the work reported in this manuscript without time limit. For all other items, the time frame for disclosure is the past 36 months.

|                                                           |                                                                                                                                                                                | Name all entities with whom you have this relationship or indicate none (add rows as needed)                                                                                                                                                                                                                                                               | Specifications/Comments (e.g., if payments were made to you or to your institution)                                                                                                        |
|-----------------------------------------------------------|--------------------------------------------------------------------------------------------------------------------------------------------------------------------------------|------------------------------------------------------------------------------------------------------------------------------------------------------------------------------------------------------------------------------------------------------------------------------------------------------------------------------------------------------------|--------------------------------------------------------------------------------------------------------------------------------------------------------------------------------------------|
| <b>Time frame: Since the initial planning of the work</b> |                                                                                                                                                                                |                                                                                                                                                                                                                                                                                                                                                            |                                                                                                                                                                                            |
| 1                                                         | All support for the present manuscript (e.g., funding, provision of study materials, medical writing, article processing charges, etc.)<br><b>No time limit for this item.</b> | Coordenação de Aperfeiçoamento de Nível Superior (CAPES; Financial Code 001), Conselho Nacional de Desenvolvimento Científico e Tecnológico (CNPQ) and Fundação de Amparo à Pesquisa do Estado do Rio Grande do Sul (FAPERGS). M.M.C. is a researcher career awardee of the Conselho Nacional de Desenvolvimento Científico e Tecnológico (304042/2018-8). |                                                                                                                                                                                            |
| <b>Time frame: past 36 months</b>                         |                                                                                                                                                                                |                                                                                                                                                                                                                                                                                                                                                            |                                                                                                                                                                                            |
| 2                                                         | Grants or contracts from any entity (if not indicated in item #1 above).                                                                                                       | <input type="checkbox"/> <input checked="" type="checkbox"/> None                                                                                                                                                                                                                                                                                          | The authors did not receive any grants or contracts from any entity, except as indicated in item #1.                                                                                       |
| 3                                                         | Royalties or licenses                                                                                                                                                          | <input type="checkbox"/> <input checked="" type="checkbox"/> None                                                                                                                                                                                                                                                                                          | The authors did not receive any royalties or licenses from any entity, except as indicated in item #1.                                                                                     |
| 4                                                         | Consulting fees                                                                                                                                                                | <input checked="" type="checkbox"/> None                                                                                                                                                                                                                                                                                                                   | The authors did not receive any consulting fees from any entity, except as indicated in item #1.                                                                                           |
| 5                                                         | Payment or honoraria for lectures, presentations, speakers bureaus, manuscript writing or                                                                                      | <input type="checkbox"/> <input checked="" type="checkbox"/> None                                                                                                                                                                                                                                                                                          | The authors did not receive payment or honoraria for lectures, presentations, speakers' bureaus, manuscript writing or educational events from any entity, except as indicated in item #1. |

|    |                                                                                                   |                                          |                                                                                                                           |
|----|---------------------------------------------------------------------------------------------------|------------------------------------------|---------------------------------------------------------------------------------------------------------------------------|
|    | educational events                                                                                |                                          |                                                                                                                           |
| 6  | Payment for expert testimony                                                                      | <input checked="" type="checkbox"/> None | The authors did not receive payment for expert testimony from any entity, except as indicated in item #1.                 |
| 7  | Support for attending meetings and/or travel                                                      | <input checked="" type="checkbox"/> None | The authors did not receive support for attending meetings and/or travel from any entity, except as indicated in item #1. |
| 8  | Patents planned, issued or pending                                                                | <input checked="" type="checkbox"/> None | The authors do not have any patents planned, issued or pending related to the manuscript.                                 |
| 9  | Participation on a Data Safety Monitoring Board or Advisory Board                                 | <input checked="" type="checkbox"/> None | The authors declare no participation on data safety monitoring board or advisory board.                                   |
| 10 | Leadership or fiduciary role in other board, society, committee or advocacy group, paid or unpaid | <input checked="" type="checkbox"/> None | The authors do not play any role in leadership or fiduciary, society, committee or advocacy group, paid or unpaid.        |
| 11 | Stock or stock options                                                                            | <input checked="" type="checkbox"/> None | The authors declare no stock or stock options related to the manuscript.                                                  |
| 12 | Receipt of equipment, materials, drugs, medical writing, gifts or other services                  | <input checked="" type="checkbox"/> None | The authors declare no received equipment, materials, drugs, medical writing, gifts or other services.                    |
| 13 | Other financial or non-financial interests                                                        | <input checked="" type="checkbox"/> None | We declare no financial interests.                                                                                        |

**Please summarize the above conflict of interest in the following box:**

This work was supported by grants from the Coordenação de Aperfeiçoamento de Nível Superior (CAPES; Financial Code 001), Conselho Nacional de Desenvolvimento Científico e Tecnológico (CNPQ) and Fundação de Amparo à Pesquisa do Estado do Rio Grande do Sul (FAPERGS). M.M.C. is a researcher career awardee of the Conselho Nacional de Desenvolvimento Científico e Tecnológico (304042/2018-8).

**Please place an “X” next to the following statement to indicate your agreement:**

**X I certify that I have answered every question and have not altered the wording of any of the questions on this form.**



## ICMJE DISCLOSURE FORM

Date: December 21<sup>th</sup>, 2021

Your Name: Ana Paula Aquistaspase Dagnino

Manuscript Title: Does fructose have a protective role on migraine? Experimental evidence in a rat model of metabolic syndrome under omega-3 supplementation

Manuscript number (if known): ATM-21-5699-CL

In the interest of transparency, we ask you to disclose all relationships/activities/interests listed below that are related to the content of your manuscript. "Related" means any relation with for-profit or not-for-profit third parties whose interests may be affected by the content of the manuscript. Disclosure represents a commitment to transparency and does not necessarily indicate a bias. If you are in doubt about whether to list a relationship/activity/interest, it is preferable that you do so.

The following questions apply to the author's relationships/activities/interests as they relate to the **current manuscript only**.

The author's relationships/activities/interests should be **defined broadly**. For example, if your manuscript pertains to the epidemiology of hypertension, you should declare all relationships with manufacturers of antihypertensive medication, even if that medication is not mentioned in the manuscript.

In item #1 below, report all support for the work reported in this manuscript without time limit. For all other items, the time frame for disclosure is the past 36 months.

|                                                           |                                                                                                                                                                                | Name all entities with whom you have this relationship or indicate none (add rows as needed)                                                                                                                                                                                                                                                               | Specifications/Comments (e.g., if payments were made to you or to your institution)                                                                                                        |
|-----------------------------------------------------------|--------------------------------------------------------------------------------------------------------------------------------------------------------------------------------|------------------------------------------------------------------------------------------------------------------------------------------------------------------------------------------------------------------------------------------------------------------------------------------------------------------------------------------------------------|--------------------------------------------------------------------------------------------------------------------------------------------------------------------------------------------|
| <b>Time frame: Since the initial planning of the work</b> |                                                                                                                                                                                |                                                                                                                                                                                                                                                                                                                                                            |                                                                                                                                                                                            |
| 1                                                         | All support for the present manuscript (e.g., funding, provision of study materials, medical writing, article processing charges, etc.)<br><b>No time limit for this item.</b> | Coordenação de Aperfeiçoamento de Nível Superior (CAPES; Financial Code 001), Conselho Nacional de Desenvolvimento Científico e Tecnológico (CNPQ) and Fundação de Amparo à Pesquisa do Estado do Rio Grande do Sul (FAPERGS). M.M.C. is a researcher career awardee of the Conselho Nacional de Desenvolvimento Científico e Tecnológico (304042/2018-8). |                                                                                                                                                                                            |
| <b>Time frame: past 36 months</b>                         |                                                                                                                                                                                |                                                                                                                                                                                                                                                                                                                                                            |                                                                                                                                                                                            |
| 2                                                         | Grants or contracts from any entity (if not indicated in item #1 above).                                                                                                       | <input type="checkbox"/> X <input type="checkbox"/> None                                                                                                                                                                                                                                                                                                   | The authors did not receive any grants or contracts from any entity, except as indicated in item #1.                                                                                       |
| 3                                                         | Royalties or licenses                                                                                                                                                          | <input type="checkbox"/> X <input type="checkbox"/> None                                                                                                                                                                                                                                                                                                   | The authors did not receive any royalties or licenses from any entity, except as indicated in item #1.                                                                                     |
| 4                                                         | Consulting fees                                                                                                                                                                | X None                                                                                                                                                                                                                                                                                                                                                     | The authors did not receive any consulting fees from any entity, except as indicated in item #1.                                                                                           |
| 5                                                         | Payment or honoraria for lectures, presentations, speakers bureaus, manuscript writing or                                                                                      | <input type="checkbox"/> X <input type="checkbox"/> None                                                                                                                                                                                                                                                                                                   | The authors did not receive payment or honoraria for lectures, presentations, speakers' bureaus, manuscript writing or educational events from any entity, except as indicated in item #1. |

|    |                                                                                                   |                                          |                                                                                                                           |
|----|---------------------------------------------------------------------------------------------------|------------------------------------------|---------------------------------------------------------------------------------------------------------------------------|
|    | educational events                                                                                |                                          |                                                                                                                           |
| 6  | Payment for expert testimony                                                                      | <input checked="" type="checkbox"/> None | The authors did not receive payment for expert testimony from any entity, except as indicated in item #1.                 |
| 7  | Support for attending meetings and/or travel                                                      | <input checked="" type="checkbox"/> None | The authors did not receive support for attending meetings and/or travel from any entity, except as indicated in item #1. |
| 8  | Patents planned, issued or pending                                                                | <input checked="" type="checkbox"/> None | The authors do not have any patents planned, issued or pending related to the manuscript.                                 |
| 9  | Participation on a Data Safety Monitoring Board or Advisory Board                                 | <input checked="" type="checkbox"/> None | The authors declare no participation on data safety monitoring board or advisory board.                                   |
| 10 | Leadership or fiduciary role in other board, society, committee or advocacy group, paid or unpaid | <input checked="" type="checkbox"/> None | The authors do not play any role in leadership or fiduciary, society, committee or advocacy group, paid or unpaid.        |
| 11 | Stock or stock options                                                                            | <input checked="" type="checkbox"/> None | The authors declare no stock or stock options related to the manuscript.                                                  |
| 12 | Receipt of equipment, materials, drugs, medical writing, gifts or other services                  | <input checked="" type="checkbox"/> None | The authors declare no received equipment, materials, drugs, medical writing, gifts or other services.                    |
| 13 | Other financial or non-financial interests                                                        | <input checked="" type="checkbox"/> None | We declare no financial interests.                                                                                        |

**Please summarize the above conflict of interest in the following box:**

This work was supported by grants from the Coordenação de Aperfeiçoamento de Nível Superior (CAPES; Financial Code 001), Conselho Nacional de Desenvolvimento Científico e Tecnológico (CNPQ) and Fundação de Amparo à Pesquisa do Estado do Rio Grande do Sul (FAPERGS). M.M.C. is a researcher career awardee of the Conselho Nacional de Desenvolvimento Científico e Tecnológico (304042/2018-8).

**Please place an “X” next to the following statement to indicate your agreement:**

**X I certify that I have answered every question and have not altered the wording of any of the questions on this form.**

## ICMJE DISCLOSURE FORM

Date: December 21<sup>th</sup>, 2021

Your Name: Maria Martha Campos

Manuscript Title: Does fructose have a protective role on migraine? Experimental evidence in a rat model of metabolic syndrome under omega-3 supplementation

Manuscript number (if known): ATM-21-5699-CL

In the interest of transparency, we ask you to disclose all relationships/activities/interests listed below that are related to the content of your manuscript. "Related" means any relation with for-profit or not-for-profit third parties whose interests may be affected by the content of the manuscript. Disclosure represents a commitment to transparency and does not necessarily indicate a bias. If you are in doubt about whether to list a relationship/activity/interest, it is preferable that you do so.

The following questions apply to the author's relationships/activities/interests as they relate to the **current manuscript only**.

The author's relationships/activities/interests should be **defined broadly**. For example, if your manuscript pertains to the epidemiology of hypertension, you should declare all relationships with manufacturers of antihypertensive medication, even if that medication is not mentioned in the manuscript.

In item #1 below, report all support for the work reported in this manuscript without time limit. For all other items, the time frame for disclosure is the past 36 months.

|                                                           |                                                                                                                                                                                | Name all entities with whom you have this relationship or indicate none (add rows as needed)                                                                                                                                                                                                                                                               | Specifications/Comments (e.g., if payments were made to you or to your institution)                                                                                                        |
|-----------------------------------------------------------|--------------------------------------------------------------------------------------------------------------------------------------------------------------------------------|------------------------------------------------------------------------------------------------------------------------------------------------------------------------------------------------------------------------------------------------------------------------------------------------------------------------------------------------------------|--------------------------------------------------------------------------------------------------------------------------------------------------------------------------------------------|
| <b>Time frame: Since the initial planning of the work</b> |                                                                                                                                                                                |                                                                                                                                                                                                                                                                                                                                                            |                                                                                                                                                                                            |
| 1                                                         | All support for the present manuscript (e.g., funding, provision of study materials, medical writing, article processing charges, etc.)<br><b>No time limit for this item.</b> | Coordenação de Aperfeiçoamento de Nível Superior (CAPES; Financial Code 001), Conselho Nacional de Desenvolvimento Científico e Tecnológico (CNPQ) and Fundação de Amparo à Pesquisa do Estado do Rio Grande do Sul (FAPERGS). M.M.C. is a researcher career awardee of the Conselho Nacional de Desenvolvimento Científico e Tecnológico (304042/2018-8). |                                                                                                                                                                                            |
| <b>Time frame: past 36 months</b>                         |                                                                                                                                                                                |                                                                                                                                                                                                                                                                                                                                                            |                                                                                                                                                                                            |
| 2                                                         | Grants or contracts from any entity (if not indicated in item #1 above).                                                                                                       | <input type="checkbox"/> None                                                                                                                                                                                                                                                                                                                              | The authors did not receive any grants or contracts from any entity, except as indicated in item #1.                                                                                       |
| 3                                                         | Royalties or licenses                                                                                                                                                          | <input type="checkbox"/> None                                                                                                                                                                                                                                                                                                                              | The authors did not receive any royalties or licenses from any entity, except as indicated in item #1.                                                                                     |
| 4                                                         | Consulting fees                                                                                                                                                                | <input checked="" type="checkbox"/> None                                                                                                                                                                                                                                                                                                                   | The authors did not receive any consulting fees from any entity, except as indicated in item #1.                                                                                           |
| 5                                                         | Payment or honoraria for lectures, presentations, speakers bureaus, manuscript writing or                                                                                      | <input type="checkbox"/> None                                                                                                                                                                                                                                                                                                                              | The authors did not receive payment or honoraria for lectures, presentations, speakers' bureaus, manuscript writing or educational events from any entity, except as indicated in item #1. |

|    |                                                                                                   |                                                                     |                                                                                                                           |
|----|---------------------------------------------------------------------------------------------------|---------------------------------------------------------------------|---------------------------------------------------------------------------------------------------------------------------|
|    | educational events                                                                                |                                                                     |                                                                                                                           |
| 6  | Payment for expert testimony                                                                      | <input checked="" type="checkbox"/> X <input type="checkbox"/> None | The authors did not receive payment for expert testimony from any entity, except as indicated in item #1.                 |
| 7  | Support for attending meetings and/or travel                                                      | <input checked="" type="checkbox"/> X <input type="checkbox"/> None | The authors did not receive support for attending meetings and/or travel from any entity, except as indicated in item #1. |
| 8  | Patents planned, issued or pending                                                                | <input checked="" type="checkbox"/> X <input type="checkbox"/> None | The authors do not have any patents planned, issued or pending related to the manuscript.                                 |
| 9  | Participation on a Data Safety Monitoring Board or Advisory Board                                 | <input checked="" type="checkbox"/> X <input type="checkbox"/> None | The authors declare no participation on data safety monitoring board or advisory board.                                   |
| 10 | Leadership or fiduciary role in other board, society, committee or advocacy group, paid or unpaid | <input checked="" type="checkbox"/> X <input type="checkbox"/> None | The authors do not play any role in leadership or fiduciary, society, committee or advocacy group, paid or unpaid.        |
| 11 | Stock or stock options                                                                            | <input checked="" type="checkbox"/> X <input type="checkbox"/> None | The authors declare no stock or stock options related to the manuscript.                                                  |
| 12 | Receipt of equipment, materials, drugs, medical writing, gifts or other services                  | <input checked="" type="checkbox"/> X <input type="checkbox"/> None | The authors declare no received equipment, materials, drugs, medical writing, gifts or other services.                    |
| 13 | Other financial or non-financial interests                                                        | <input checked="" type="checkbox"/> X <input type="checkbox"/> None | We declare no financial interests.                                                                                        |

**Please summarize the above conflict of interest in the following box:**

This work was supported by grants from the Coordenação de Aperfeiçoamento de Nível Superior (CAPES; Financial Code 001), Conselho Nacional de Desenvolvimento Científico e Tecnológico (CNPQ) and Fundação de Amparo à Pesquisa do Estado do Rio Grande do Sul (FAPERGS). M.M.C. is a researcher career awardee of the Conselho Nacional de Desenvolvimento Científico e Tecnológico (304042/2018-8).

**Please place an “X” next to the following statement to indicate your agreement:**

**X I certify that I have answered every question and have not altered the wording of any of the questions on this form.**
