# Supplementary material for: Does fructose have a protective role on migraine?—experimental evidence in a rat model of metabolic syndrome under omega-3 supplementation
Source: PubMed Central journal article supplement — Ann Transl Med. 2022 Apr;10(8):435. doi: 10.21037/atm-21-5699 (PMC9096372; doi:10.21037/atm-21-5699), 2022-04
Supplement: atm-10-08-435-supplementary.pdf [file atm-10-08-435-supplementary.pdf]

## Supplementary

**Table S1** Descriptive statistics showing the variations of the grimace scale AUC values in the following experimental groups: water control (water + saline); HFD control (HFD + saline); migraine-like pain induction (water + NTG); and HFD plus migraine-like pain induction (HFD + NTG); with or without n-3 supplementation (water + n-3; HFD + n-3; n-3 + NTG; HFD + n-3 + NTG)

|                | Water  |       |      |           | HFD    |       |      |           |
|----------------|--------|-------|------|-----------|--------|-------|------|-----------|
|                | Saline | NTG   | n-3  | n-3 + NTG | Saline | NTG   | n-3  | n-3 + NTG |
| Minimum Values | 0.18   | 5.70  | 0.00 | 3.83      | 0.00   | 3.26  | 0.00 | 5.89      |
| Maximum Values | 0.82   | 7.95  | 2.18 | 7.83      | 1.53   | 7.30  | 2.03 | 7.86      |
| Sum of Totals  | 4.58   | 57.09 | 4.00 | 46.94     | 3.17   | 40.67 | 4.95 | 58.91     |

Data are presented with a number of 7 to 8 rats per group.
